# Supplementary material for: The effect of small incision lenticule extraction on contrast sensitivity
Source: Front Neurosci. 2023 Apr 12;17:1132681. doi: 10.3389/fnins.2023.1132681 (PMC10130440; doi:10.3389/fnins.2023.1132681)
Supplement: Supplementary file 1 [file Data_Sheet_1.docx]

***Supplementary Material***

**The effect of small incision lenticule extraction on contrast sensitivity**

**Pinqing Yue1, Zeng Wang2, Di Wu3, Hua Zhang4*, Pan Zhang1***

1 Department of Psychology, Hebei Normal University, Shijiazhuang, China, 050024;

2 Department of Psychology, Hebei Medical University, Shijiazhuang, China, 050017;

3 Department of Medical Psychology, Air Force Medical University, Xi’an, China, 710032;

4 Department of Ophthalmology, Shijiazhuang People’s Hospital, Shijiazhuang, China, 050025;

***Corresponding:**

Pan Zhang, [zhang2005pan@126.com](mailto:zhang2005pan@126.com);

Hua Zhang, [zhanghua_dr@126.com](mailto:zhanghua_dr@126.com)

# 1 Supplementary Tables

| **Table S1.** P-values for Comparisonof CS between different time points at each SF | | | | |
| --- | --- | --- | --- | --- |
| external noise | SF (cpd) | time point (I) | time point (J) | *AD*(I-J) |
| zero | 0.5 | posttest 1 | pretest | 0.315** |
|  |  | posttest 2 | pretest | 0.504*** |
|  |  |  | posttest 1 | 0.189* |
|  | 0.67 | posttest 1 | pretest | 0.423*** |
|  |  | posttest 2 | pretest | 0.646*** |
|  |  |  | posttest 1 | 0.224** |
|  | 1 | posttest 1 | pretest | 0.644*** |
|  |  | posttest 2 | pretest | 0.921*** |
|  |  |  | posttest 1 | 0.276*** |
|  | 1.33 | posttest 1 | pretest | 0.756*** |
|  |  | posttest 2 | pretest | 1.072*** |
|  |  |  | posttest 1 | 0.317*** |
|  | 2 | posttest 1 | pretest | 0.833*** |
|  |  | posttest 2 | pretest | 1.210*** |
|  |  |  | posttest 1 | 0.377*** |
|  | 2.67 | posttest 1 | pretest | 0.711*** |
|  |  | posttest 2 | pretest | 1.131*** |
|  |  |  | posttest 1 | 0.420*** |
|  | 4 | posttest 1 | pretest | 0.411*** |
|  |  | posttest 2 | pretest | 0.807*** |
|  |  |  | posttest 1 | 0.397*** |
|  | 5.33 | posttest 1 | pretest | 0.206** |
|  |  | posttest 2 | pretest | 0.564*** |
|  |  |  | posttest 1 | 0.358*** |
|  | 8 | posttest 1 | pretest | 0.052 |
|  |  | posttest 2 | pretest | 0.282** |
|  |  |  | posttest 1 | 0.229** |
|  | 16 | posttest 1 | pretest | 0.000 |
|  |  | posttest 2 | pretest | 0.005 |
|  |  |  | posttest 1 | 0.005 |
| low | 0.5 | posttest 1 | pretest | -0.190* |
|  |  | posttest 2 | pretest | -0.114 |
|  |  |  | posttest 1 | 0.075 |
|  | 0.67 | posttest 1 | pretest | -0.121 |
|  |  | posttest 2 | pretest | -0.030 |
|  |  |  | posttest 1 | 0.091 |
|  | 1 | posttest 1 | pretest | 0.139 |
|  |  | posttest 2 | pretest | 0.290** |
|  |  |  | posttest 1 | 0.151* |
|  | 1.33 | posttest 1 | pretest | 0.343** |
|  |  | posttest 2 | pretest | 0.511*** |
|  |  |  | posttest 1 | 0.168* |
|  | 2 | posttest 1 | pretest | 0.571*** |
|  |  | posttest 2 | pretest | 0.757*** |
|  |  |  | posttest 1 | 0.186** |
|  | 2.67 | posttest 1 | pretest | 0.616*** |
|  |  | posttest 2 | pretest | 0.816*** |
|  |  |  | posttest 1 | 0.200** |
|  | 4 | posttest 1 | pretest | 0.484*** |
|  |  | posttest 2 | pretest | 0.718*** |
|  |  |  | posttest 1 | 0.234** |
|  | 5.33 | posttest 1 | pretest | 0.338*** |
|  |  | posttest 2 | pretest | 0.594*** |
|  |  |  | posttest 1 | 0.256** |
|  | 8 | posttest 1 | pretest | 0.165** |
|  |  | posttest 2 | pretest | 0.368*** |
|  |  |  | posttest 1 | 0.203* |
|  | 16 | posttest 1 | pretest | 0.001 |
|  |  | posttest 2 | pretest | 0.057 |
|  |  |  | posttest 1 | 0.057 |
| high | 0.5 | posttest 1 | pretest | -0.186** |
|  |  | posttest 2 | pretest | -0.080 |
|  |  |  | posttest 1 | 0.106** |
|  | 0.67 | posttest 1 | pretest | -0.172*** |
|  |  | posttest 2 | pretest | -0.069 |
|  |  |  | posttest 1 | 0.102** |
|  | 1 | posttest 1 | pretest | -0.043 |
|  |  | posttest 2 | pretest | 0.042 |
|  |  |  | posttest 1 | 0.086* |
|  | 1.33 | posttest 1 | pretest | 0.122* |
|  |  | posttest 2 | pretest | 0.210** |
|  |  |  | posttest 1 | 0.088** |
|  | 2 | posttest 1 | pretest | 0.300*** |
|  |  | posttest 2 | pretest | 0.413*** |
|  |  |  | posttest 1 | 0.114*** |
|  | 2.67 | posttest 1 | pretest | 0.368*** |
|  |  | posttest 2 | pretest | 0.502*** |
|  |  |  | posttest 1 | 0.134*** |
|  | 4 | posttest 1 | pretest | 0.352*** |
|  |  |  | posttest 2 | -0.167 |
|  |  | posttest 2 | pretest | 0.519*** |
|  |  |  | posttest 1 | 0.167*** |
|  | 5.33 | posttest 1 | pretest | 0.285*** |
|  |  | posttest 2 | pretest | 0.467*** |
|  |  |  | posttest 1 | 0.182** |
|  | 8 | posttest 1 | pretest | 0.178** |
|  |  | posttest 2 | pretest | 0.335*** |
|  |  |  | posttest 1 | 0.158* |
|  | 16 | posttest 1 | pretest | 0.037 |
|  |  | posttest 2 | pretest | 0.096* |
|  |  |  | posttest 1 | 0.060 |

*Note. AD* represents average difference.**p* < 0.05; ***p* < 0.01; ****p* < 0.001.

| **Table S2.** P-values for comparison of CS improvement between different SFs | | | | | | | | | | | |
| --- | --- | --- | --- | --- | --- | --- | --- | --- | --- | --- | --- |
| time point | external noise | SF (cpd) | 0.67 | 1 | 1.33 | 2 | 2.67 | 4 | 5.33 | 8 | 16 |
| posttest 1 | zero | 0.5 | 0.002 | 0.000 | 0.000 | 0.001 | 0.013 | 0.463 | 0.360 | 0.010 | 0.001 |
|  |  | 0.67 |  | 0.000 | 0.000 | 0.004 | 0.056 | 0.928 | 0.096 | 0.002 | 0.000 |
|  |  | 1 |  |  | 0.014 | 0.112 | 0.637 | 0.102 | 0.006 | 0.000 | 0.000 |
|  |  | 1.33 |  |  |  | 0.340 | 0.680 | 0.006 | 0.000 | 0.000 | 0.000 |
|  |  | 2 |  |  |  |  | 0.006 | 0.000 | 0.000 | 0.000 | 0.000 |
|  |  | 2.67 |  |  |  |  |  | 0.000 | 0.000 | 0.000 | 0.000 |
|  |  | 4 |  |  |  |  |  |  | 0.000 | 0.000 | 0.000 |
|  |  | 5.33 |  |  |  |  |  |  |  | 0.003 | 0.009 |
|  |  | 8 |  |  |  |  |  |  |  |  | 0.131 |
|  |  |  |  |  |  |  |  |  |  |  |  |
|  | low | 0.5 | 0.093 | 0.005 | 0.000 | 0.000 | 0.000 | 0.000 | 0.000 | 0.000 | 0.039 |
|  |  | 0.67 |  | 0.001 | 0.000 | 0.000 | 0.000 | 0.000 | 0.000 | 0.001 | 0.081 |
|  |  | 1 |  |  | 0.000 | 0.000 | 0.000 | 0.001 | 0.071 | 0.813 | 0.137 |
|  |  | 1.33 |  |  |  | 0.000 | 0.001 | 0.114 | 0.962 | 0.141 | 0.003 |
|  |  | 2 |  |  |  |  | 0.180 | 0.168 | 0.018 | 0.001 | 0.000 |
|  |  | 2.67 |  |  |  |  |  | 0.006 | 0.002 | 0.000 | 0.000 |
|  |  | 4 |  |  |  |  |  |  | 0.000 | 0.000 | 0.000 |
|  |  | 5.33 |  |  |  |  |  |  |  | 0.000 | 0.000 |
|  |  | 8 |  |  |  |  |  |  |  |  | 0.006 |
|  |  |  |  |  |  |  |  |  |  |  |  |
|  | high | 0.5 | 0.382 | 0.010 | 0.001 | 0.000 | 0.000 | 0.000 | 0.000 | 0.000 | 0.000 |
|  |  | 0.67 |  | 0.002 | 0.000 | 0.000 | 0.000 | 0.000 | 0.000 | 0.000 | 0.000 |
|  |  | 1 |  |  | 0.000 | 0.000 | 0.000 | 0.000 | 0.000 | 0.001 | 0.060 |
|  |  | 1.33 |  |  |  | 0.000 | 0.000 | 0.001 | 0.021 | 0.410 | 0.142 |
|  |  | 2 |  |  |  |  | 0.003 | 0.228 | 0.785 | 0.057 | 0.000 |
|  |  | 2.67 |  |  |  |  |  | 0.583 | 0.073 | 0.002 | 0.000 |
|  |  | 4 |  |  |  |  |  |  | 0.003 | 0.000 | 0.000 |
|  |  | 5.33 |  |  |  |  |  |  |  | 0.000 | 0.000 |
|  |  | 8 |  |  |  |  |  |  |  |  | 0.002 |
|  |  |  |  |  |  |  |  |  |  |  |  |
| posttest 2 | zero | 0.5 | 0.000 | 0.000 | 0.000 | 0.000 | 0.000 | 0.075 | 0.714 | 0.131 | 0.000 |
|  |  | 0.67 |  | 0.000 | 0.000 | 0.000 | 0.003 | 0.322 | 0.619 | 0.023 | 0.000 |
|  |  | 1 |  |  | 0.002 | 0.018 | 0.143 | 0.470 | 0.041 | 0.001 | 0.000 |
|  |  | 1.33 |  |  |  | 0.093 | 0.594 | 0.049 | 0.001 | 0.000 | 0.000 |
|  |  | 2 |  |  |  |  | 0.066 | 0.000 | 0.000 | 0.000 | 0.000 |
|  |  | 2.67 |  |  |  |  |  | 0.000 | 0.000 | 0.000 | 0.000 |
|  |  | 4 |  |  |  |  |  |  | 0.000 | 0.000 | 0.000 |
|  |  | 5.33 |  |  |  |  |  |  |  | 0.000 | 0.000 |
|  |  | 8 |  |  |  |  |  |  |  |  | 0.002 |
|  |  |  |  |  |  |  |  |  |  |  |  |
|  | low | 0.5 | 0.027 | 0.000 | 0.000 | 0.000 | 0.000 | 0.000 | 0.000 | 0.001 | 0.121 |
|  |  | 0.67 |  | 0.000 | 0.000 | 0.000 | 0.000 | 0.000 | 0.000 | 0.003 | 0.351 |
|  |  | 1 |  |  | 0.000 | 0.000 | 0.000 | 0.000 | 0.011 | 0.485 | 0.032 |
|  |  | 1.33 |  |  |  | 0.000 | 0.001 | 0.015 | 0.360 | 0.167 | 0.000 |
|  |  | 2 |  |  |  |  | 0.048 | 0.334 | 0.016 | 0.000 | 0.000 |
|  |  | 2.67 |  |  |  |  |  | 0.005 | 0.001 | 0.000 | 0.000 |
|  |  | 4 |  |  |  |  |  |  | 0.000 | 0.000 | 0.000 |
|  |  | 5.33 |  |  |  |  |  |  |  | 0.000 | 0.000 |
|  |  | 8 |  |  |  |  |  |  |  |  | 0.000 |
|  |  |  |  |  |  |  |  |  |  |  |  |
|  | high | 0.5 | 0.526 | 0.018 | 0.001 | 0.000 | 0.000 | 0.000 | 0.000 | 0.000 | 0.021 |
|  |  | 0.67 |  | 0.002 | 0.000 | 0.000 | 0.000 | 0.000 | 0.000 | 0.000 | 0.012 |
|  |  | 1 |  |  | 0.000 | 0.000 | 0.000 | 0.000 | 0.000 | 0.000 | 0.289 |
|  |  | 1.33 |  |  |  | 0.000 | 0.000 | 0.000 | 0.000 | 0.056 | 0.057 |
|  |  | 2 |  |  |  |  | 0.001 | 0.016 | 0.247 | 0.183 | 0.000 |
|  |  | 2.67 |  |  |  |  |  | 0.530 | 0.338 | 0.005 | 0.000 |
|  |  | 4 |  |  |  |  |  |  | 0.005 | 0.000 | 0.000 |
|  |  | 5.33 |  |  |  |  |  |  |  | 0.000 | 0.000 |
|  |  | 8 |  |  |  |  |  |  |  |  | 0.000 |
